# Supplementary material for: The Cyprinodon variegatus genome reveals gene expression changes underlying differences in skull morphology among closely related species
Source: PubMed Central journal article supplement (PMC5450241; doi:10.1186/s12864-017-3810-7), 2017-05-30
Supplement: 12864_2017_3810_MOESM4_ESM.pdf [file 12864_2017_3810_MOESM4_ESM.pdf]

48 hpf

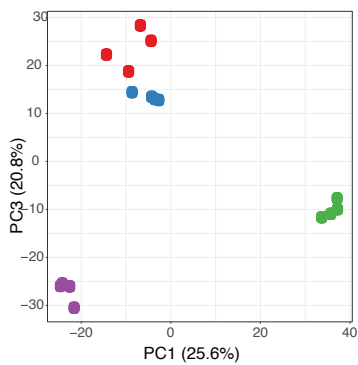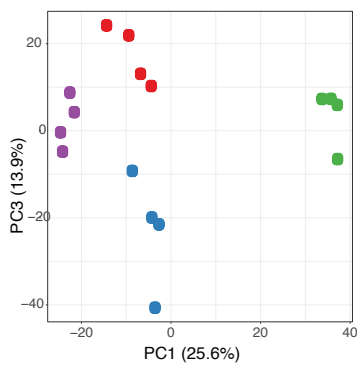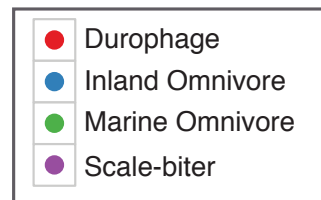

96 hpf

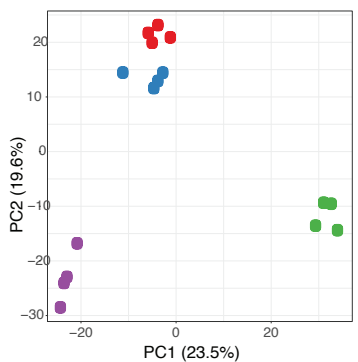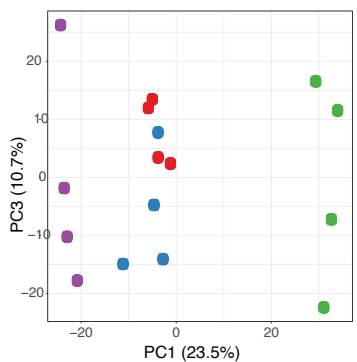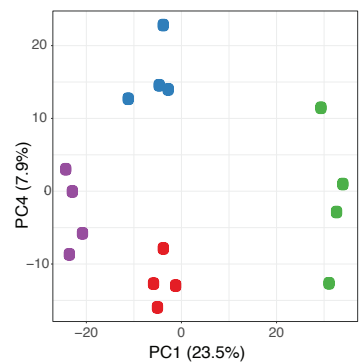

8 dpf

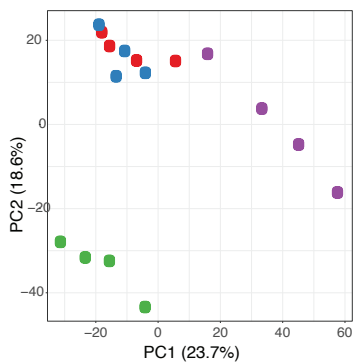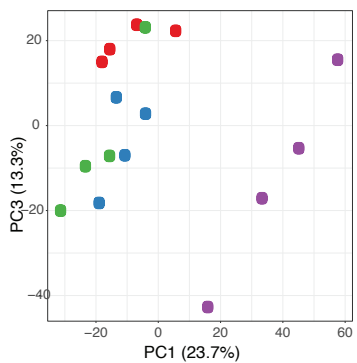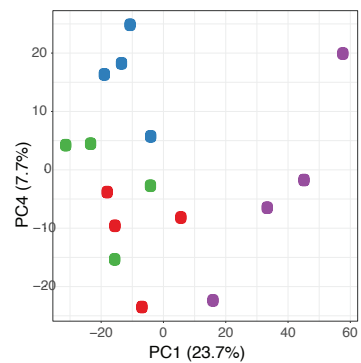

15 dpf

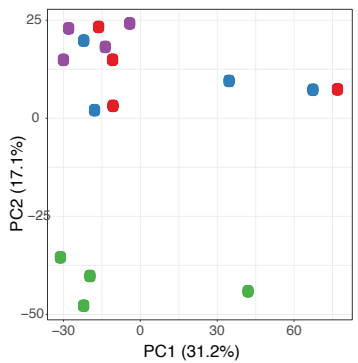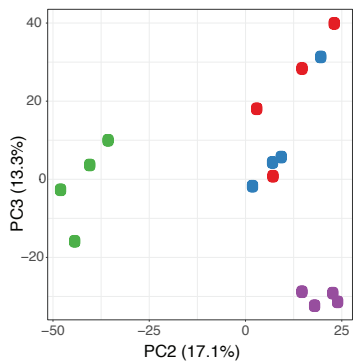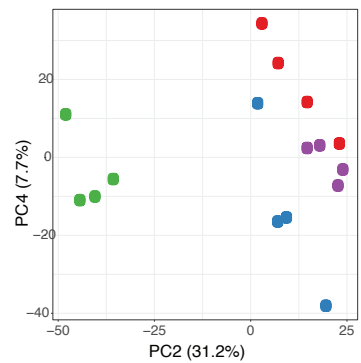

Figure S3
