# Supplementary material for: The Cyprinodon variegatus genome reveals gene expression changes underlying differences in skull morphology among closely related species
Source: PubMed Central journal article supplement (PMC5450241; doi:10.1186/s12864-017-3810-7), 2017-05-30
Supplement: 12864_2017_3810_MOESM16_ESM.pdf [file 12864_2017_3810_MOESM16_ESM.pdf]

# A 48 hpf Intersection Set

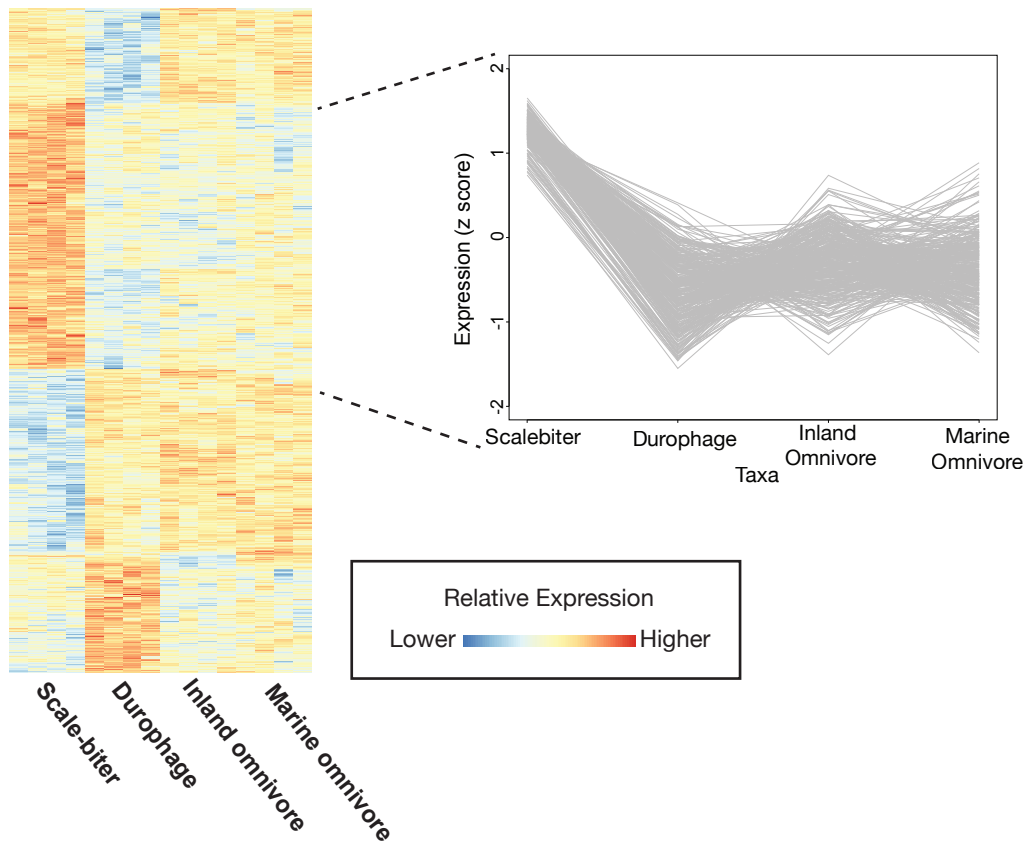

# B

## 96 hpf Intersection Set

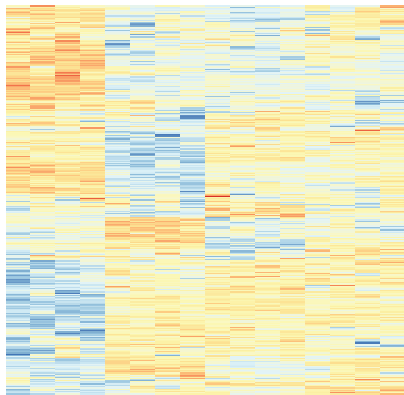

## 8 dpf Intersection Set

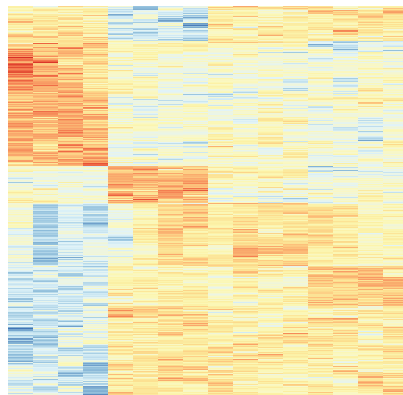

## 15 dpf Intersection Set

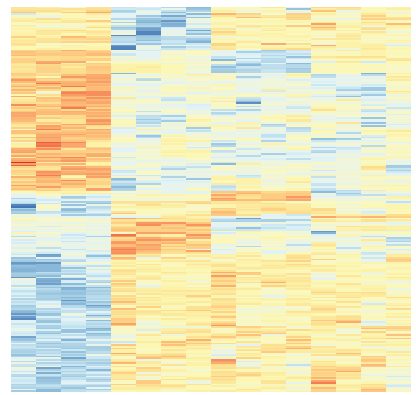

**Figure S9**
